# Supplementary material for: Laser-Modified Ti Surface Improves Paracrine Osteogenesis by Modulating the Expression of DKK1 in Osteoblasts
Source: MDPI journal article supplement (doi:10.3390/jfb14040224), 2023-04-16
Supplement: s1 [file s1]

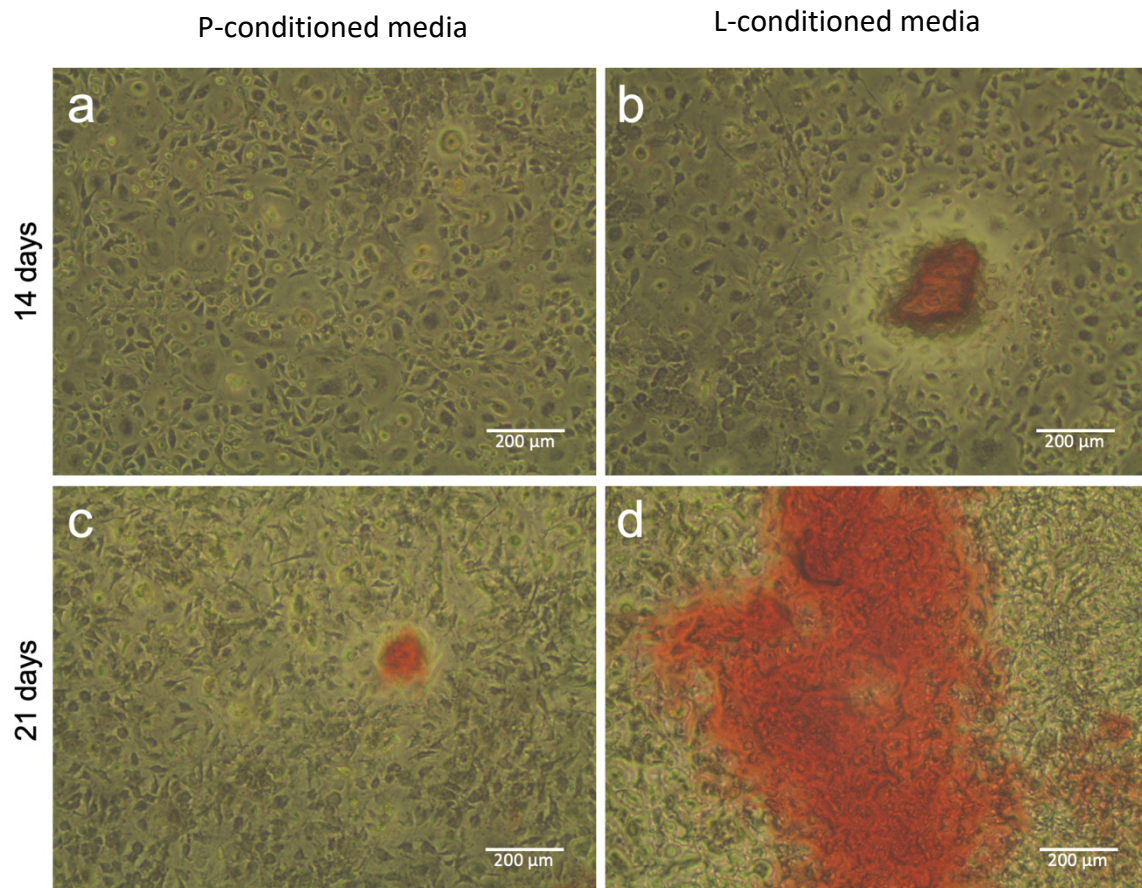

**Supplemental Figure S1.** Representative images of BMCs cultured in P-conditioned or L-conditioned media for 7 and 21 days.
